# Supplementary material for: Novel Insights into the Regulatory Architecture of CD4+ T Cells in Rheumatoid Arthritis
Source: PLoS One. 2014 Jun 24;9(6):e100690. doi: 10.1371/journal.pone.0100690 (PMC4069080; doi:10.1371/journal.pone.0100690)
Supplement: Table S4 — Trans associations in CD4+ T cells for M9 module genes (P<1e-5). Abbreviations: Gene chr, Chromosomal location of the expressed gene; Gene coord, Coordinates of the expressed gene; Bp, Base pair; SNP chr, Chromosomal location of the SNP; SNP coord, Coordinates of the SNP; Beta, Slope coefficient; FDR, P-value False Discovery Rate. (XLS) [file pone.0100690.s004.xls]

## Sheet: TableS4
Table S4. Trans associations in CD4+ T cells for M9 module genes (P<1e-5).
GENE SYMBOL	ENTREZ ID	ILLUMINA GENE ID	SNP	GENE CHR	GENE COORD. (bp)	SNP CHR	SNP COORD. (bp)	BETA	P-VALUE	FDR
FCER1A	2205	GI_31317229-S	rs9293162	chr1	159259503-159278014	chr5	25065470	1851	1.193e-07	0.0775
FCER1A	2205	GI_31317229-S	rs978897	chr1	159259503-159278014	chr7	15598156	1670	3.286e-07	0.0941
CCR3	1232	GI_30581168-I	rs6537307	chr3	46283871-46308197	chr4	145601863	0.131	6.566e-07	0.1606
FCER1A	2205	GI_31317229-S	rs17196569	chr1	159259503-159278014	chr13	100816862	1624	8.739e-07	0.1606
CCR3	1232	GI_30581168-I	rs11944404	chr3	46283871-46308197	chr4	145670871	0.117	1.127e-06	0.1614
MS4A2	2206	GI_23397640-S	rs552946	chr11	59856136-59865940	chr7	138642602	0.400	3.531e-06	0.2732
FCER1A	2205	GI_31317229-S	rs11943513	chr1	159259503-159278014	chr4	80743976	0.909	5.681e-06	0.2732
MS4A2	2206	GI_23397640-S	rs4299283	chr11	59856136-59865940	chr2	192580887	0.574	6.661e-06	0.2732
MS4A2	2206	GI_23397640-S	rs4076769	chr11	59856136-59865940	chr2	192584206	0.574	6.661e-06	0.2732
FCER1A	2205	GI_31317229-S	rs11736645	chr1	159259503-159278014	chr4	187427709	1552	6.875e-06	0.2732
CCR3	1232	GI_30581168-I	rs951252	chr3	46283871-46308197	chr4	145825151	0.110	7.554e-06	0.2732
MS4A2	2206	GI_23397640-S	rs7022225	chr11	59856136-59865940	chr9	112536455	-0.412	8.048e-06	0.2821
